# Supplementary material for: Na2HPO4-modified NaY nanocrystallites: efficient catalyst for acrylic acid production through lactic acid dehydration
Source: Royal Society of Chemistry journal article supplement (doi:10.1039/c3cy00935a), 2014-01-01
Supplement: c3cy00935a1.pdf [file c3cy00935a1.pdf]

## Electronic Supplementary Information

**Table S1.** Comparison of the representative catalyst systems in LA dehydration

| Research Work   | Catalyst System                                      | LA Feedstock Concentration (wt %) | LA Conv. (%) | AA Yield (%) | Reaction Temp. (°C) |
|-----------------|------------------------------------------------------|-----------------------------------|--------------|--------------|---------------------|
| Reference 9     | CuSO <sub>4</sub> /Na <sub>2</sub> SO <sub>4</sub>   | 10                                | 80           | 54           | 400                 |
| Reference 10    | NH <sub>3</sub> -treated AlPO <sub>4</sub>           | 22                                | 100          | 43.3         | 340                 |
| Reference 11    | Phosphates + NaHCO <sub>3</sub>                      | 20                                | 89           | 58           | 350                 |
| Reference 12b,d | Phosphates                                           | 34                                | /            | 36           | 350                 |
| Reference 17a   | Calcium hydroxyapatite                               | 50                                | 100          | 60           | 375                 |
| Reference 17b   | Barium sulfate                                       | 20                                | 99.8         | 74           | 400                 |
| Reference 22    | NaNO <sub>3</sub> /SBA-15                            | 37                                | 97           | 44.8         | 360                 |
| Reference 25d   | KI/NaY <sub>com</sub>                                | 29                                | 97.6         | 67.9         | 325                 |
| Reference 26    | Na <sub>2</sub> HPO <sub>4</sub> /NaY <sub>com</sub> | 34                                | 85           | 56.6         | 340                 |
| This work       | Na <sub>2</sub> HPO <sub>4</sub> /NaY-20.1           | 34                                | 93.5         | 74.3         | 340                 |

**Table S2.** Quantified areas of the overall desorption peaks for the unloaded and loaded NaY<sub>com</sub> and NaY-*n*

| Samples  | NaY <sub>com</sub> | NaY-13.8 | NaY-16.9 | NaY-20.1 | NaY-26.3 |
|----------|--------------------|----------|----------|----------|----------|
| Unloaded | 267                | 238      | 240      | 284      | 308      |
| Loaded   | 213                | 220      | 210      | 214      | 249      |

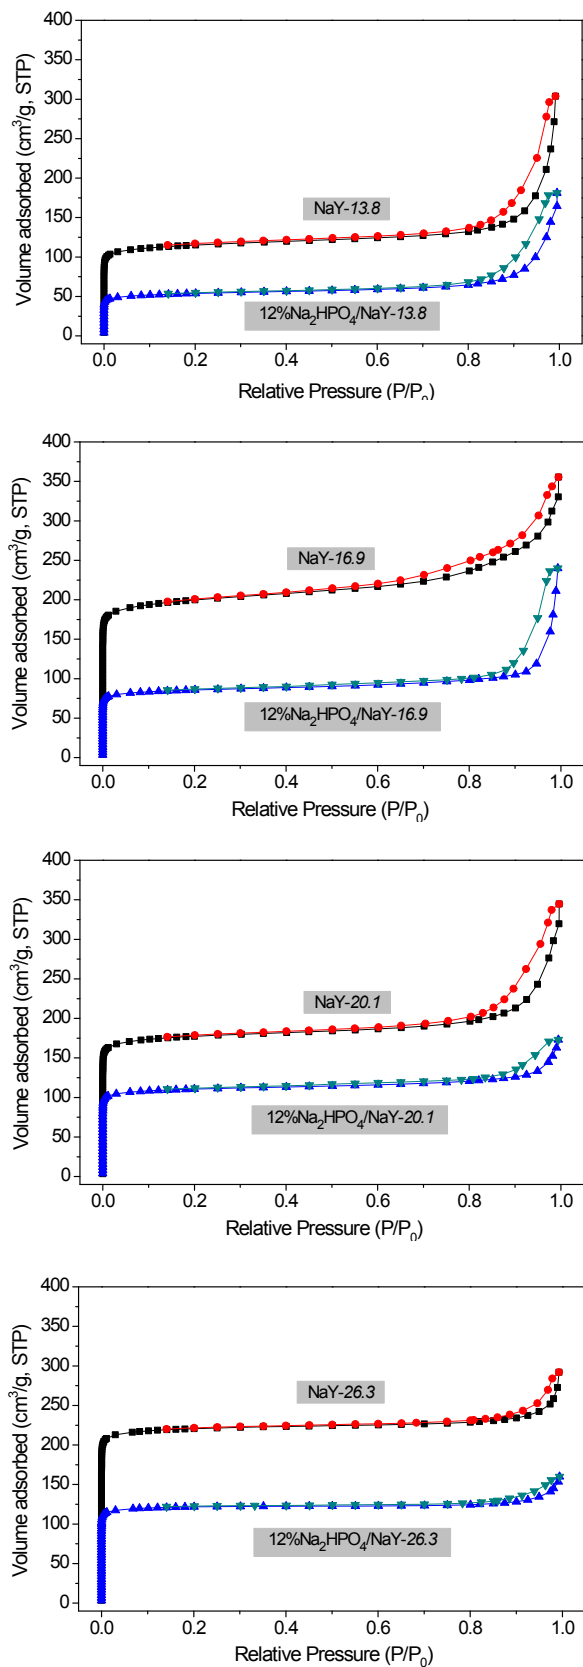

**Fig. S1.** The isotherms liner plots of NaY-*n* and 12%Na<sub>2</sub>HPO<sub>4</sub>/NaY-*n*.

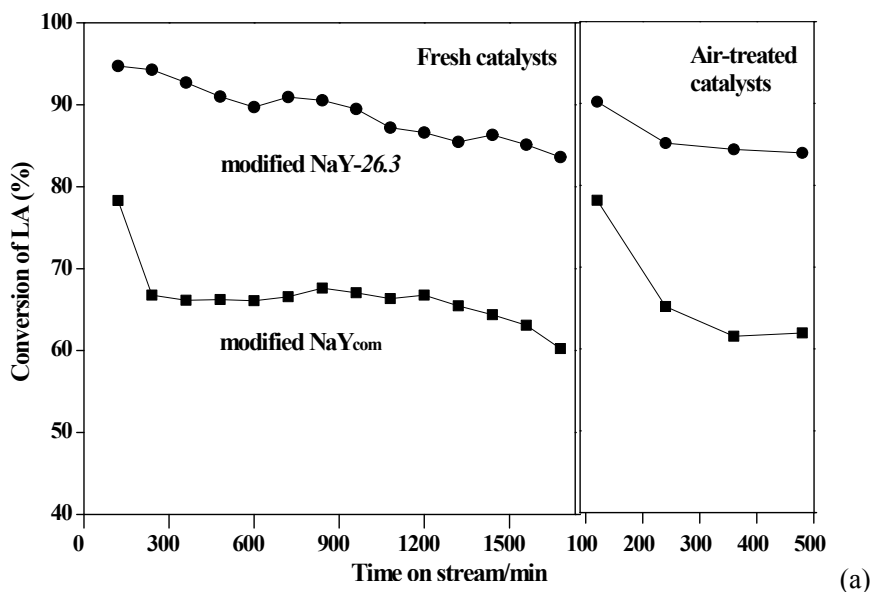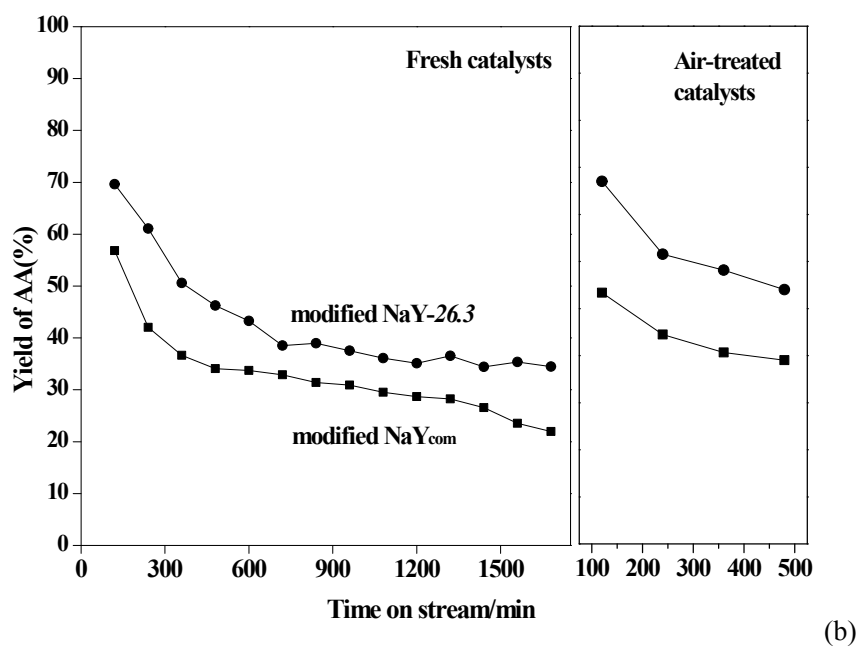

**Fig. S2.** (a) Conversion of LA and (b) yield of AA as a function of time on stream over  $\text{Na}_2\text{HPO}_4$  modified  $\text{NaY}_{\text{com}}$  and  $\text{NaY-26.3}$ : the fresh catalysts subject to a period of 1700 min reaction, and the air-treated catalysts subject to a period of 480 min reaction. Reaction temperature = 340 °C, LA concentration = 34 wt %, and  $\text{N}_2$  carrier flow rate = 30 ml/min.

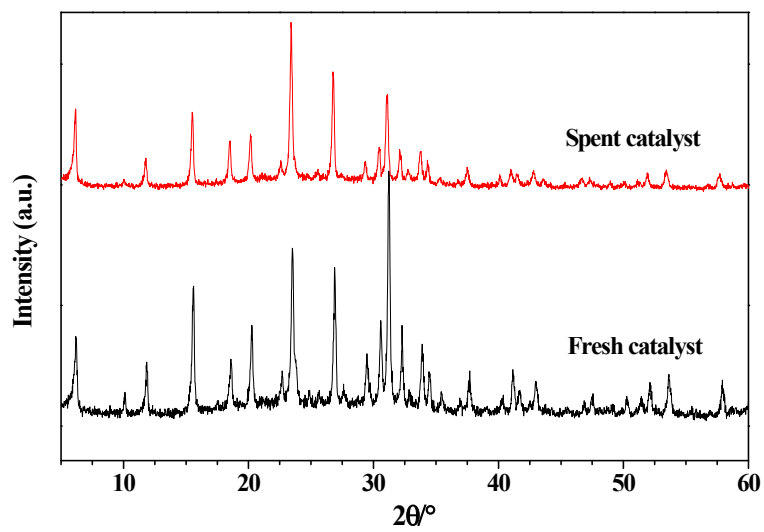

**Fig. S3.** XRD patterns of the fresh and used  $\text{Na}_2\text{HPO}_4/\text{NaY-26.3}$ .
